# Supplementary material
Source: publisher site journal article supplement (https://www.dovepress.com/article/461514)
Supplement: Supplementary file 1 [file get_supplementary_file.php]

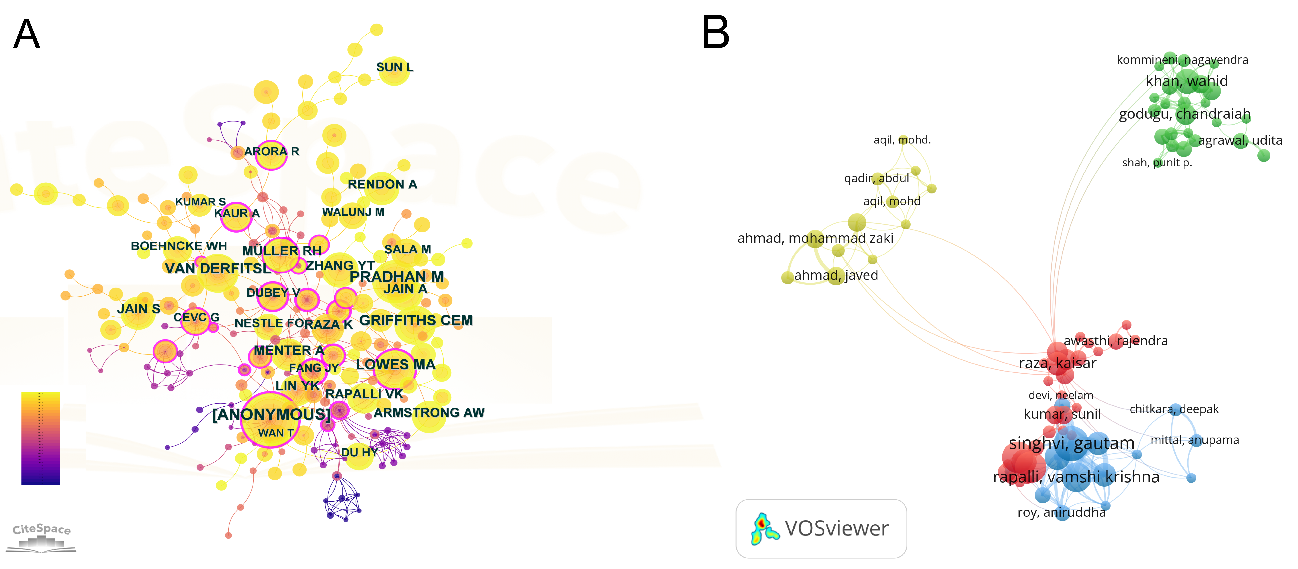


**Figure S1 Analysis of authors contributing to research on topical drug delivery systems for psoriasis. (A) Visualization of the co-cited author network: Circle size represents each author's publication volume; the color gradient from the circle's center to its periphery indicates the years from an author's first to the most recent publication; and the circle width signifies the annual publication volume. (B) Collaboration network among authors.**

**Table S1** **The top 10 productive countries and institutions in research on topical drug delivery systems for psoriasis.**

| Rank | Country | Number of publications | Number of citations | Average number of citations | H-index | Institution | Number of publications | Number of citations |
| --- | --- | --- | --- | --- | --- | --- | --- | --- |
| 1 | India | 198 | 5468 | 27.62 | 40 | Jamia Hamdard University | 20 | 394 |
| 2 | China | 135 | 4061 | 30.08 | 29 | Chang Gung University | 17 | 921 |
| 4 | USA | 115 | 6837 | 59.45 | 37 | ISF College of Pharmacy | 15 | 250 |
| 3 | Saudi Arabia | 40 | 862 | 21.55 | 4 | Prince Sattam bin Abdulaziz University | 13 | 138 |
| 5 | United Kingdom | 40 | 1728 | 43.20 | 15 | University of Porto | 13 | 550 |
| 6 | Egypt | 35 | 998 | 28.51 | 13 | Chang Gung University of Science and Technology | 12 | 270 |
| 7 | Italy | 30 | 978 | 32.60 | 13 | National Institute of Pharmaceutical Education & Research | 12 | 154 |
| 9 | Germany | 29 | 997 | 34.38 | 10 | Panjab University | 11 | 480 |
| 8 | Brazil | 29 | 783 | 27.00 | 13 | Ain Shams University | 11 | 225 |
| 10 | Portugal | 27 | 846 | 31.33 | 15 | University of São Paulo | 11 | 264 |

**Table S2** **The top 10 productive authors and co-cited authors in research on topical drug delivery systems for psoriasis.**

| Rank | Author | Publications | Citations | H-index | Rank | Co-cited Author | Co-citations |
| --- | --- | --- | --- | --- | --- | --- | --- |
| 1 | Gautam Singhvi | 12 | 286 | 6 | 1 | Madhulika Pradhan | 108 |
| 2 | Jia-You Fang | 8 | 843 | 10 | 2 | Lowes, Michelle A. | 88 |
| 3 | Manju Rawat Singh | 7 | 472 | 8 | 3 | Griffiths, Christopher E.M. | 80 |
| 4 | Deependra Singh | 7 | 472 | 9 | 4 | Van der Fits, Leslie | 80 |
| 5 | Tejashree Waghule | 6 | 230 | 2 | 5 | Yong-Tai Zhang | 62 |
| 6 | Sunil Kumar Dubey | 6 | 230 | 6 | 6 | Aklank Jain | 59 |
| 7 | Vamshi Krishna Rapalli | 6 | 273 | 8 | 7 | Yin-Ku Lin | 59 |
| 8 | Srividya Gorantla | 6 | 233 | 2 | 8 | Menter, Alan | 59 |
| 9 | Ahmed Alalaiwe | 5 | 127 | 5 | 9 | Sanyog Jain | 56 |
| 10 | Krishna Yadav | 5 | 70 | 5 | 10 | R H Müller | 55 |

**Table S3** **The top 10 productive journals and co-cited journals in research on topical drug delivery systems for psoriasis.**

| Rank | Journal | Publications | Citations | IF and JCR division (2022) | Co-cited Journal | Co-citations | Centrality | IF and JCR division (2022) |
| --- | --- | --- | --- | --- | --- | --- | --- | --- |
| 1 | International Journal of Pharmaceutics | 56 | 135 | 5.8, Q1 | International Journal of Pharmaceutics | 497 | 0.12 | 5.8, Q1 |
| 2 | Journal of Drug Delivery Science and Technology | 40 | 128 | 5.0, Q1 | Journal of Controlled Release | 485 | 0.18 | 10.8, Q1 |
| 3 | Journal of Controlled Release | 30 | 89 | 10.8, Q1 | European Journal of Pharmaceutics and Biopharmaceutics | 368 | 0.12 | 4.9, Q1 |
| 4 | Pharmaceutics | 25 | 201 | 5.4, Q1 | Journal of Investigative Dermatology | 348 | 0.17 | 6.5, Q1 |
| 5 | European Journal of Pharmaceutics and Biopharmaceutics | 19 | 584 | 4.9, Q1 | Journal of the American Academy of Dermatology | 315 | 0.20 | 13.8, Q1 |
| 6 | Expert Opinion on Drug Delivery | 15 | 169 | 6.6, Q1 | British Journal of Dermatology | 308 | 0.63 | 10.3, Q1 |
| 7 | International Journal of Molecular Sciences | 14 | 80 | 5.6, Q1 | Advanced Drug Delivery Reviews | 272 | 0.07 | 16.1, Q1 |
| 8 | Drug Delivery and Translational Research | 13 | 258 | 5.4, Q1 | Colloids and Surfaces B: Biointerfaces | 266 | 0.07 | 5.8, Q1 |
| 9 | International Journal of Nanomedicine | 13 | 165 | 8.0, Q1 | International Journal of Nanomedicine | 258 | 0.07 | 8.0, Q1 |
| 10 | Colloids and Surfaces B: Biointerfaces | 13 | 104 | 5.8, Q1 | European Journal of Pharmaceutical Sciences | 252 | 0.15 | 4.6, Q2 |

**Table S4** **The top 10 cited research references on topical drug delivery systems for psoriasis.**

| Rank | Title (Year) | Journal | First Author | Citations | IF (2022) |
| --- | --- | --- | --- | --- | --- |
| 1 | Overcoming the Achilles' heel of photodynamic therapy | Chemical Society Reviews | Wenpei Fan | 1094 | 46.2 |
| 2 | Discovery and Development of Folic-Acid-Based Receptor Targeting for Imaging and Therapy of Cancer and Inflammatory Diseases | Accounts of Chemical Research | Philip S. Low | 926 | 18.3 |
| 3 | Conjugation of arginine oligomers to cyclosporin A facilitates topical delivery and inhibition of inflammation | Nature Medicine | Jonathan B. Rothbard | 543 | 82.9 |
| 4 | Lipid nanoparticles as vehicles for topical psoralen delivery: Solid lipid nanoparticles (SLN) versus nanostructured lipid carriers (NLC) | European Journal of Pharmaceutics and Biopharmaceutics | Jia-You Fang | 743 | 4.9 |
| 5 | Topical tofacitinib for atopic dermatitis: a phase IIa randomized trial | British Journal of Dermatology | R. Bissonnette | 281 | 10.3 |
| 6 | Dermal and transdermal delivery of an anti-psoriatic agent via ethanolic liposomes | Journal of Controlled Release | Vaibhav Dubey | 249 | 10.8 |
| 7 | Preparation and in vitro evaluation of liposomal/niosomal delivery systems for antipsoriatic drug dithranol | International Journal of Pharmaceutics | R Agarwal | 213 | 5.8 |
| 8 | Polymeric nanoparticles-based topical delivery systems for the treatment of dermatological diseases | Wiley Interdisciplinary Reviews: Nanomedicine and Nanobiotechnology | Zheng Zhang | 207 | 8.6 |
| 9 | Deformable liposomes for dermal administration of methotrexate | International Journal of Pharmaceutics | Michele Trotta | 191 | 5.8 |
| 10 | Drug delivery to the nail following topical application | International Journal of Pharmaceutics | Sudaxshina Murdan | 186 | 5.8 |

**Table S5** **The top 20 co-occurrence keywords involved in T cells and psoriasis.**

| Rank | Keywords | Occurrences | Rank | Keywords | Occurrences |
| --- | --- | --- | --- | --- | --- |
| 1 | nanoparticles | 97 | 11 | therapy | 30 |
| 2 | formulation | 79 | 12 | management | 28 |
| 3 | penetration | 62 | 13 | pathogenesis | 25 |
| 4 | solid lipid nanoparticles | 47 | 14 | methotrexate | 22 |
| 5 | nanostructured lipid carriers | 44 | 15 | inflammation | 21 |
| 6 | efficacy | 37 | 16 | optimization | 20 |
| 7 | gel | 37 | 17 | liposm | 18 |
| 8 | atopic dermatitis | 36 | 18 | permeation | 18 |
| 9 | skin penetration | 33 | 19 | cyclosporine A | 16 |
| 10 | skin inflammation | 30 | 20 | model | 15 |
